# Supplementary material for: Left ventricular mechanical dysfunction in diet-induced obese mice is exacerbated during inotropic stress: a cine DENSE cardiovascular magnetic resonance study
Source: Springer Nature journal article supplement (doi:10.1186/s12968-015-0180-7), 2015-01-01
Supplement: MOESM1 [file 9767784]

**Table S1. Average Peak Left Ventricular Strain [%] at Baseline**

| Weeks on diet | Peak $E_{rr}$ , Control |         | Peak $E_{rr}$ , Obese |         | Peak $E_{cc}$ , Control |         | Peak $E_{cc}$ , Obese |         | Peak $E_{ll}$ , Control |         | Peak $E_{ll}$ , Obese |         |
|---------------|-------------------------|---------|-----------------------|---------|-------------------------|---------|-----------------------|---------|-------------------------|---------|-----------------------|---------|
|               | Mean                    | St. Dev | Mean                  | St. Dev | Mean                    | St. Dev | Mean                  | St. Dev | Mean                    | St. Dev | Mean                  | St. Dev |
| 4             | 37.6                    | 6.5     | 34.8                  | 5.5     | 14.3                    | 1.2     | 14.2                  | 1.0     | 12.7                    | 1.0     | 12.2                  | 1.0     |
| 10            | 36.7                    | 6.1     | 41.2                  | 4.9     | 14.0                    | 1.4     | 14.7                  | 1.0     | 11.2                    | 1.4     | 12.0                  | 1.2     |
| 16            | 43.0                    | 6.5     | 41.8                  | 8.4     | 14.5                    | 1.2     | 15.1                  | 1.1     | 13.5                    | 0.9     | 12.5                  | 0.7     |
| 22            | 41.1                    | 4.4     | 39.3                  | 5.7     | 14.8                    | 0.8     | 14.7                  | 1.3     | 12.7                    | 1.3     | 11.8                  | 1.3     |
| 28            | 40.9                    | 5.0     | 35.3                  | 3.7     | 15.2                    | 1.0     | 14.1                  | 1.1     | 12.2                    | 1.6     | 11.5                  | 1.5     |
| 34            | 37.2                    | 7.0     | 35.2                  | 4.8     | 14.9                    | 1.1     | 14.4                  | 0.9     | 11.7                    | 1.3     | 11.4                  | 0.9     |
| 42            | 33.0                    | 2.6     | 30.4                  | 3.0     | 14.4                    | 0.8     | 14.6                  | 1.2     | 12.1                    | 0.8     | 10.6                  | 1.3     |
| 54            | 40.5                    | 6.1     | 34.0                  | 4.4     | 14.5                    | 1.6     | 13.4                  | 0.7     | 12.8                    | 1.6     | 10.0                  | 1.4     |

$E_{rr}$  – radial strain,  $E_{cc}$  – circumferential strain,  $E_{ll}$  – longitudinal strain

**Table S2. Cardiac period [ms] during scanning**

| Weeks on diet | Control, Baseline |         | Obese, Baseline |         | Control, Stress |         | Obese, Stress |         |
|---------------|-------------------|---------|-----------------|---------|-----------------|---------|---------------|---------|
|               | Mean              | St. Dev | Mean            | St. Dev | Mean            | St. Dev | Mean          | St. Dev |
| 4             | 134.2             | 9.5     | 131.1           | 11.71   | 100.6           | 3.0     | 101.9         | 5.5     |
| 10            | 129.9             | 7.8     | 128.5           | 15.3    | 104.2           | 6.2     | 107.1         | 4.3     |
| 16            | 146.5             | 9.1     | 147.6           | 10.2    | 106.3           | 4.6     | 107.2         | 4.6     |
| 22            | 136.6             | 12.0    | 144.6           | 19.5    | 106.2           | 5.4     | 106.1         | 4.9     |
| 28            | 144.2             | 14.3    | 144.0           | 16.9    | 103.7           | 5.2     | 107.1         | 3.6     |
| 34            | 133.2             | 15.8    | 140.1           | 18.9    | N/A             | N/A     | N/A           | N/A     |
| 42            | 130.4             | 11.5    | 129.0           | 15.2    | N/A             | N/A     | N/A           | N/A     |
| 54/55         | 131.7             | 12.1    | 123.4           | 18.5    | 104.1           | 6.0     | 110.1         | 5.3     |

**Table S3. Average Peak Left Ventricular Systolic Strain Rate [%/ms] at Baseline**

| Weeks on diet | $\partial E_{rr}/\partial t$ , Control |         | $\partial E_{rr}/\partial t$ , Obese |         | $\partial E_{cc}/\partial t$ , Control |         | $\partial E_{cc}/\partial t$ , Obese |         | $\partial E_{ll}/\partial t$ , Control |         | $\partial E_{ll}/\partial t$ , Obese |         |
|---------------|----------------------------------------|---------|--------------------------------------|---------|----------------------------------------|---------|--------------------------------------|---------|----------------------------------------|---------|--------------------------------------|---------|
|               | Mean                                   | St. Dev | Mean                                 | St. Dev | Mean                                   | St. Dev | Mean                                 | St. Dev | Mean                                   | St. Dev | Mean                                 | St. Dev |
| 4             | 1.12                                   | 0.25    | 1.07                                 | 0.25    | 0.51                                   | 0.05    | 0.54                                 | 0.06    | 0.49                                   | 0.12    | 0.51                                 | 0.08    |
| 10            | 1.19                                   | 0.19    | 1.35                                 | 0.22    | 0.54                                   | 0.05    | 0.58                                 | 0.05    | 0.46                                   | 0.07    | 0.48                                 | 0.04    |
| 16            | 1.14                                   | 0.17    | 1.09                                 | 0.19    | 0.52                                   | 0.06    | 0.51                                 | 0.04    | 0.51                                   | 0.08    | 0.45                                 | 0.08    |
| 22            | 1.16                                   | 0.19    | 1.10                                 | 0.15    | 0.53                                   | 0.05    | 0.50                                 | 0.06    | 0.45                                   | 0.06    | 0.41                                 | 0.04    |
| 28            | 1.05                                   | 0.11    | 1.00                                 | 0.16    | 0.52                                   | 0.07    | 0.50                                 | 0.04    | 0.46                                   | 0.07    | 0.50                                 | 0.14    |
| 34            | 1.13                                   | 0.27    | 1.00                                 | 0.13    | 0.55                                   | 0.05    | 0.53                                 | 0.05    | 0.42                                   | 0.05    | 0.50                                 | 0.26    |
| 42            | 1.04                                   | 0.19    | 0.99                                 | 0.11    | 0.56                                   | 0.06    | 0.55                                 | 0.02    | 0.50                                   | 0.08    | 0.44                                 | 0.07    |
| 54            | 1.24                                   | 0.28    | 1.15                                 | 0.28    | 0.52                                   | 0.05    | 0.50                                 | 0.03    | 0.49                                   | 0.08    | 0.43                                 | 0.10    |

$\partial E_{rr}/\partial t$  – radial strain rate,  $\partial E_{cc}/\partial t$  – circumferential strain rate,  $\partial E_{ll}/\partial t$  – longitudinal strain rate

**Table S4. Average Peak Left Ventricular Diastolic Strain Rate [%/ms] at Baseline**

| Weeks on diet | $\partial E_{rr}/\partial t$ , Control |         | $\partial E_{rr}/\partial t$ , Obese |         | $\partial E_{cc}/\partial t$ , Control |         | $\partial E_{cc}/\partial t$ , Obese |         | $\partial E_{ll}/\partial t$ , Control |         | $\partial E_{ll}/\partial t$ , Obese |         |
|---------------|----------------------------------------|---------|--------------------------------------|---------|----------------------------------------|---------|--------------------------------------|---------|----------------------------------------|---------|--------------------------------------|---------|
|               | Mean                                   | St. Dev | Mean                                 | St. Dev | Mean                                   | St. Dev | Mean                                 | St. Dev | Mean                                   | St. Dev | Mean                                 | St. Dev |
| 4             | -1.15                                  | 0.26    | -1.00                                | 0.23    | -0.39                                  | 0.06    | -0.39                                | 0.05    | -0.34                                  | 0.09    | -0.34                                | 0.09    |
| 10            | -1.09                                  | 0.22    | -1.25                                | 0.25    | -0.39                                  | 0.04    | -0.43                                | 0.06    | -0.26                                  | 0.06    | -0.32                                | 0.08    |
| 16            | -1.27                                  | 0.26    | -1.21                                | 0.30    | -0.36                                  | 0.04    | -0.41                                | 0.06    | -0.35                                  | 0.06    | -0.28                                | 0.06    |
| 22            | -1.23                                  | 0.23    | -1.14                                | 0.27    | -0.41                                  | 0.05    | -0.43                                | 0.09    | -0.35                                  | 0.05    | -0.29                                | 0.08    |
| 28            | -1.22                                  | 0.14    | -1.01                                | 0.23    | -0.43                                  | 0.12    | -0.42                                | 0.09    | -0.35                                  | 0.07    | -0.33                                | 0.12    |
| 34            | -1.18                                  | 0.34    | -1.01                                | 0.19    | -0.44                                  | 0.11    | -0.44                                | 0.07    | -0.34                                  | 0.11    | -0.34                                | 0.08    |
| 42            | -1.09                                  | 0.17    | -1.02                                | 0.14    | -0.43                                  | 0.06    | -0.45                                | 0.07    | -0.35                                  | 0.12    | -0.29                                | 0.11    |
| 54            | -1.24                                  | 0.36    | -1.16                                | 0.32    | -0.44                                  | 0.08    | -0.47                                | 0.07    | -0.40                                  | 0.09    | -0.45                                | 0.23    |

**Table S5. Peak Left Ventricular Torsion [°/cm] at Baseline**

| Weeks on diet | Control |         | Obese |         |
|---------------|---------|---------|-------|---------|
|               | Mean    | St. Dev | Mean  | St. Dev |
| 4             | 4.0     | 0.4     | 4.0   | 0.6     |
| 10            | 3.6     | 0.6     | 3.9   | 0.4     |
| 16            | 4.1     | 0.5     | 3.7   | 0.6     |
| 22            | 3.9     | 0.7     | 3.6   | 0.4     |
| 28            | 4.1     | 0.4     | 3.5   | 0.7     |
| 34            | 4.1     | 0.4     | 3.9   | 0.6     |
| 42            | 4.0     | 0.5     | 3.6   | 0.4     |
| 54            | 4.0     | 0.7     | 3.8   | 0.6     |

**Table S6. Average Peak Left Ventricular Strain [%] at Stress**

| Weeks on diet | Peak $E_{rr}$ , Control |         | Peak $E_{rr}$ , Obese |         | Peak $E_{cc}$ , Control |         | Peak $E_{cc}$ , Obese |         | Peak $E_{ll}$ , Control |         | Peak $E_{ll}$ , Obese |         |
|---------------|-------------------------|---------|-----------------------|---------|-------------------------|---------|-----------------------|---------|-------------------------|---------|-----------------------|---------|
|               | Mean                    | St. Dev | Mean                  | St. Dev | Mean                    | St. Dev | Mean                  | St. Dev | Mean                    | St. Dev | Mean                  | St. Dev |
| 4             | 34.6                    | 5.4     | 41.8                  | 5.4     | 15.7                    | 2.1     | 15.9                  | 1.3     | 12.1                    | 0.8     | 12.4                  | 1.3     |
| 10            | 42.5                    | 4.7     | 40.2                  | 6.5     | 16.3                    | 0.7     | 17.2                  | 1.4     | 11.8                    | 0.6     | 12.4                  | 1.3     |
| 16            | 46.4                    | 5.3     | 43.8                  | 4.8     | 15.4                    | 1.5     | 15.8                  | 1.3     | 11.8                    | 1.3     | 12.2                  | 1.9     |
| 22            | 47.8                    | 5.0     | 43.1                  | 5.1     | 15.9                    | 1.0     | 16.0                  | 1.5     | 12.5                    | 1.1     | 10.8                  | 1.7     |
| 28            | 47.1                    | 6.6     | 43.5                  | 9.6     | 16.3                    | 1.4     | 16.4                  | 1.3     | 11.9                    | 1.3     | 11.1                  | 1.6     |
| 55            | 41.2                    | 4.0     | 34.6                  | 4.8     | 16.4                    | 0.9     | 14.8                  | 1.7     | 11.5                    | 1.8     | 9.6                   | 1.8     |

**Table S7. Average Peak Left Ventricular Systolic Strain Rate [%/ms] at Stress**

| Weeks on diet | $\partial E_{rr}/\partial t$ , Control |         | $\partial E_{rr}/\partial t$ , Obese |         | $\partial E_{cc}/\partial t$ , Control |         | $\partial E_{cc}/\partial t$ , Obese |         | $\partial E_{\parallel}/\partial t$ , Control |         | $\partial E_{\parallel}/\partial t$ , Obese |         |
|---------------|----------------------------------------|---------|--------------------------------------|---------|----------------------------------------|---------|--------------------------------------|---------|-----------------------------------------------|---------|---------------------------------------------|---------|
|               | Mean                                   | St. Dev | Mean                                 | St. Dev | Mean                                   | St. Dev | Mean                                 | St. Dev | Mean                                          | St. Dev | Mean                                        | St. Dev |
| 4             | 1.40                                   | 0.28    | 1.56                                 | 0.30    | 0.74                                   | 0.11    | 0.73                                 | 0.11    | 0.61                                          | 0.10    | 0.60                                        | 0.11    |
| 10            | 1.63                                   | 0.30    | 1.46                                 | 0.28    | 0.77                                   | 0.06    | 0.76                                 | 0.10    | 0.60                                          | 0.12    | 0.61                                        | 0.11    |
| 16            | 1.83                                   | 0.23    | 1.70                                 | 0.20    | 0.75                                   | 0.06    | 0.70                                 | 0.03    | 0.62                                          | 0.09    | 0.63                                        | 0.11    |
| 22            | 1.98                                   | 0.20    | 1.61                                 | 0.19    | 0.77                                   | 0.04    | 0.68                                 | 0.02    | 0.63                                          | 0.05    | 0.52                                        | 0.07    |
| 28            | 1.93                                   | 0.22    | 1.68                                 | 0.31    | 0.78                                   | 0.05    | 0.68                                 | 0.04    | 0.60                                          | 0.07    | 0.54                                        | 0.11    |
| 55            | 1.60                                   | 0.26    | 1.20                                 | 0.16    | 0.78                                   | 0.06    | 0.60                                 | 0.10    | 0.62                                          | 0.11    | 0.48                                        | 0.14    |

**Table S8. Average Peak Left Ventricular Diastolic Strain Rate [%/ms] at Stress**

| Weeks on diet | $\partial E_{rr}/\partial t$ , Control |         | $\partial E_{rr}/\partial t$ , Obese |         | $\partial E_{cc}/\partial t$ , Control |         | $\partial E_{cc}/\partial t$ , Obese |         | $\partial E_{\parallel}/\partial t$ , Control |         | $\partial E_{\parallel}/\partial t$ , Obese |         |
|---------------|----------------------------------------|---------|--------------------------------------|---------|----------------------------------------|---------|--------------------------------------|---------|-----------------------------------------------|---------|---------------------------------------------|---------|
|               | Mean                                   | St. Dev | Mean                                 | St. Dev | Mean                                   | St. Dev | Mean                                 | St. Dev | Mean                                          | St. Dev | Mean                                        | St. Dev |
| 4             | -1.15                                  | 0.35    | -1.69                                | 0.33    | -0.61                                  | 0.12    | -0.58                                | 0.06    | -0.49                                         | 0.15    | -0.48                                       | 0.08    |
| 10            | -1.54                                  | 0.31    | -1.46                                | 0.26    | -0.57                                  | 0.08    | -0.60                                | 0.10    | -0.49                                         | 0.15    | -0.40                                       | 0.10    |
| 16            | -1.87                                  | 0.26    | -1.63                                | 0.24    | -0.52                                  | 0.06    | -0.55                                | 0.05    | -0.54                                         | 0.10    | -0.38                                       | 0.15    |
| 22            | -1.96                                  | 0.24    | -1.77                                | 0.31    | -0.57                                  | 0.05    | -0.63                                | 0.14    | -0.49                                         | 0.13    | -0.43                                       | 0.12    |
| 28            | -1.87                                  | 0.29    | -1.77                                | 0.40    | -0.60                                  | 0.07    | -0.65                                | 0.11    | -0.48                                         | 0.13    | -0.42                                       | 0.16    |
| 55            | -1.48                                  | 0.30    | -1.20                                | 0.24    | -0.57                                  | 0.08    | -0.54                                | 0.09    | -0.51                                         | 0.17    | -0.36                                       | 0.10    |

**Table S9. Peak Left Ventricular Torsion [°/cm] at Stress**

| Weeks on diet | Control |         | Obese |         |
|---------------|---------|---------|-------|---------|
|               | Mean    | St. Dev | Mean  | St. Dev |
| 4             | 5.0     | 1.3     | 5.6   | 0.7     |
| 10            | 5.1     | 0.6     | 6.1   | 1.3     |
| 16            | 5.0     | 1.0     | 5.1   | 0.4     |
| 22            | 5.8     | 0.7     | 5.2   | 0.4     |
| 28            | 5.8     | 0.7     | 5.2   | 0.7     |
| 55            | 5.8     | 0.8     | 4.1   | 0.6     |
